# Supplementary material
Source: MDPI journal article supplement (https://www.mdpi.com/2311-7524/9/1/76)
Supplement: s1 [file s1]

# Antioxidant capacity and shelf life of radish microgreens affected by growth light and cultivar

Selma Mlinarić <sup>1</sup>, Antonija Piškor <sup>1,2</sup>, Anja Melnjak <sup>1</sup>, Alma Mikuška <sup>1</sup>, Martina Šrajer Gajdošik <sup>3</sup> and Lidija Begović <sup>1,\*</sup>

## Supplementary Material

**Table S1.** The influence of blue/red combination (B:2R) and white (B:G:R) LED light on measured parameters in three seven-day old radish microgreens cultivars determined before storage (control).

| Parameter                                                         | Cultivar | Light spectral treatments    |                              |
|-------------------------------------------------------------------|----------|------------------------------|------------------------------|
|                                                                   |          | B:2R                         | B:G:R                        |
| Total chlorophyll content<br>(mg/g <sub>FW</sub> )                | cvP      | 0.323 ± 0.026 <sup>ab</sup>  | 0.298 ± 0.021 <sup>b</sup>   |
|                                                                   | cvR      | 0.298 ± 0.009 <sup>b</sup>   | 0.268 ± 0.049 <sup>b</sup>   |
|                                                                   | cvG      | 0.367 ± 0.024 <sup>a</sup>   | 0.320 ± 0.064 <sup>ab</sup>  |
| Carotenoid content<br>(mg/g <sub>FW</sub> )                       | cvP      | 0.060 ± 0.011 <sup>ab</sup>  | 0.055 ± 0.004 <sup>bc</sup>  |
|                                                                   | cvR      | 0.058 ± 0.003 <sup>abc</sup> | 0.046 ± 0.006 <sup>c</sup>   |
|                                                                   | cvG      | 0.069 ± 0.005 <sup>a</sup>   | 0.059 ± 0.017 <sup>abc</sup> |
| Total soluble proteins<br>(mg/g <sub>FW</sub> )                   | cvP      | 0.973 ± 0.180 <sup>cd</sup>  | 0.851 ± 0.080 <sup>e</sup>   |
|                                                                   | cvR      | 1.211 ± 0.070 <sup>a</sup>   | 1.150 ± 0.270 <sup>ab</sup>  |
|                                                                   | cvG      | 0.928 ± 0.091 <sup>de</sup>  | 1.052 ± 0.106 <sup>bc</sup>  |
| Total soluble sugars<br>(mg/g <sub>DM</sub> )                     | cvP      | 7.319 ± 0.712 <sup>b</sup>   | 8.256 ± 1.619 <sup>ab</sup>  |
|                                                                   | cvR      | 9.726 ± 1.308 <sup>a</sup>   | 8.649 ± 1.629 <sup>ab</sup>  |
|                                                                   | cvG      | 7.666 ± 1.905 <sup>ab</sup>  | 8.053 ± 0.803 <sup>ab</sup>  |
| Dry matter content<br>(%)                                         | cvP      | 4.784 ± 0.082 <sup>ab</sup>  | 4.941 ± 0.812 <sup>ab</sup>  |
|                                                                   | cvR      | 5.648 ± 0.667 <sup>a</sup>   | 4.589 ± 0.156 <sup>b</sup>   |
|                                                                   | cvG      | 5.073 ± 0.665 <sup>ab</sup>  | 5.078 ± 0.220 <sup>ab</sup>  |
| TAC by DPPH<br>(μmol <sub>TROLOXeq</sub> /g <sub>FW</sub> )       | cvP      | 0.930 ± 0.023 <sup>b</sup>   | 0.618 ± 0.025 <sup>d</sup>   |
|                                                                   | cvR      | 1.282 ± 0.045 <sup>a</sup>   | 1.299 ± 0.050 <sup>a</sup>   |
|                                                                   | cvG      | 0.671 ± 0.029 <sup>c</sup>   | 0.538 ± 0.015 <sup>e</sup>   |
| TAC by FRAP<br>(μmol <sub>TROLOXeq</sub> /g <sub>FW</sub> )       | cvP      | 4.320 ± 0.542 <sup>a</sup>   | 2.392 ± 0.120 <sup>c</sup>   |
|                                                                   | cvR      | 3.777 ± 0.151 <sup>a</sup>   | 3.732 ± 0.510 <sup>ab</sup>  |
|                                                                   | cvG      | 3.133 ± 0.312 <sup>b</sup>   | 2.099 ± 0.104 <sup>c</sup>   |
| Monomeric anthocyanins<br>(mg/g <sub>FW</sub> )                   | cvP      | 3.895 ± 0.224 <sup>c</sup>   | 2.929 ± 0.240 <sup>c</sup>   |
|                                                                   | cvR      | 21.314 ± 1.037 <sup>b</sup>  | 24.818 ± 1.892 <sup>a</sup>  |
|                                                                   | cvG      | ND                           | ND                           |
| Total soluble phenolic<br>(mg <sub>GAEeq</sub> /g <sub>FW</sub> ) | cvP      | 2.085 ± 0.170 <sup>b</sup>   | 1.478 ± 0.130 <sup>c</sup>   |
|                                                                   | cvR      | 1.998 ± 0.069 <sup>b</sup>   | 2.460 ± 0.096 <sup>a</sup>   |
|                                                                   | cvG      | 2.492 ± 0.251                | 1.264 ± 0.067 <sup>c</sup>   |
| Ascorbic acid<br>(mg/100g <sub>FW</sub> )                         | cvP      | 7.349 ± 0.429 <sup>a</sup>   | 5.257 ± 0.126 <sup>d</sup>   |
|                                                                   | cvR      | 6.849 ± 0.274 <sup>b</sup>   | 5.266 ± 0.090 <sup>d</sup>   |
|                                                                   | cvG      | 5.910 ± 0.169 <sup>c</sup>   | 4.327 ± 0.166 <sup>e</sup>   |

Data are showing mean values of three replicates ( $n = 3$ ) ± standard deviation (SD). Different letters are representing significant difference ( $p \leq 0.05$ ) between three cultivars of radish microgreens grown under the two light spectra

(ANOVA, LSD). cvP – China rose radish (*R. sativus* cult. China Rose); cvR – red radish (*R. sativus* cult. Sango); cvG – Japanese white or daikon radish (*Raphanus sativus* var. *longipinnatus*); TAC – total antioxidant capacity; FW – fresh weight; DM – dry matter; ND – not detected.
